# Supplementary material
Source: Research Square preprint supplement (doi:10.21203/rs.3.rs-9551629/v1)
Supplement: Supplementary file 1 [file 05125af27b3e9f70fbfe5eb0.docx]

**Supplemental Materials**

**Mental disorders as risk factors for developing functional somatic disorder**

***- a Danish population-based follow-up study***

Marie Weinreich Petersen, PhD1,2, Tina Birgitte Wisbech Carstensen, PhD1,2, Kaare Bro Wellnitz, PhD1,2, Eva Ørnbøl, MSc1,2,Thomas Meinertz Dantoft, PhD3, Lene Falgaard Eplov, PhD4, Prof. Lisbeth Frostholm, PhD1,2,and Prof. Per Fink, DMSc1,2

**Affiliations:**

1Research Clinic for Functional Disorders and Psychosomatics, Aarhus University Hospital, Aarhus, Denmark

2Department of Clinical Medicine, University of Aarhus, Aarhus, Denmark

3Center for Clinical Research and Prevention, Bispebjerg/Frederiksberg Hospital, Capital Region, Denmark

4Unit for Recovery, Mental Health Center, Capital Region, Denmark

**Table S1: Included diagnoses and psychoactive medication**

| **Mental disorder** | **Included diagnosis codes** | **Excluded diagnosis codes** | **Included ATC codes** |
| --- | --- | --- | --- |
| Alcohol and drug abuse | F1 F10 E244 G312 G621 G721 I426  K292 K70 K852 K860 Q860 | F100, F17 | V03AA  N07BB  N07BC01  N07BC51 |
| Anxiety disorders | F40 F41 F42 |  | N06A |
| Depression and Bipolar disorders | F32 F33 F30 F31 |  | N06A  N05AN01 |
| Developmental and behavioural disorders | F84 F9 | F99 |  |
| Eating disorders | F500 F501 F502 F503 |  |  |
| Personality disorders | F60 |  |  |
| Schizophrenia spectrum disorders | F2 |  |  |
| Stress-related disorders | F43 |  |  |

Included diagnosis codes: Inpatient and outpatient hospital discharge diagnoses of mental disorders were identified in the Danish National Patient Registry according to the 10th revision of the International Classification of Diseases (ICD-10) within a time frame of 10 years before DanFunD inclusion.

Excluded diagnosis codes: Diagnostic codes that were not included in the definition of the specific disease category.

Included ATC codes: Prescriptions of psychoactive medication were identified via the Anatomical Therapeutic Chemical (ATC) classification system from the Danish National Prescription Registry within a time frame of 10 years before DanFunD inclusion.

**Table S2: Baseline characteristics of the complete follow-up study sample (n=5,738)**

|  | No FSDa  (n = 4,512) | Overall FSDa  (n = 792) | Single-organ FSDa  (n = 775) | Multi-organ FSDa  (n = 37) | IBa  (n = 186) | CWPa  (n = 227) | CFa  (n = 409) |
| --- | --- | --- | --- | --- | --- | --- | --- |
|  |  |  |  |  |  |  |  |
| Women; N (%) | 2,255 (49∙98) | 537 (67.80) | 510 (67.55) | 27 (72.97) | 134 (72.04) | 177 (77.97) | 292 (71.39) |
| Age at baseline; median (IQR) | 55 (47-64) | 57 (48-64) | 57 (48-64) | 53∙50 (45∙00-56∙50) | 52 (44-61) | 58 (51-65) | 52 (43-60) |
| Social status; median (IQR) | 7 (6-8) | 6 (5-7) | 6 (5-7) | 5 (5-7) | 6 (5-8) | 6 (5-7) | 6 (5-7) |
| Physical comorbidity; N (%) | 231 (5.12) | 76 (9.60) | 71 (9.40) | 5 (13.51) | 15 (8.06) | 25 (11.01) | 38 (9.29) |
| Neuroticism; median (IQR) | 14 (10-19) | 19 (14-25) | 19 (14-25) | 25∙50 (19-32∙50) | 20 (16-26) | 20 (15-26) | 24 (18-29) |
|  |  |  |  |  |  |  |  |
| At least one psychiatric discharge diagnosis; N (%) | 75 (1.66) | 51 (6.44) | 44 (5.83) | 7 (18.92) | 10 (5.38) | 10 (4.41) | 27 (6.60) |
| Anxiety disorder | 13 (0.29) | 10 (1.26) | NA | NA | NA | NA | 6 (1.47) |
| Depression | 21 (0.47) | 19 (2.40) | 8 (1.06) | 3 (8.11) | 3 (1.61) | 4 (1.76) | 10 (2.44) |
| Personality disorder | NA | 5 (0∙63) | NA | NA | NA | NA | NA |
| Stress-related disorder | 39 (0.86) | 20 (2.53) | 17 (2.25) | 3 (8.11) | 8 (4.30) | NA | 12 (2.93) |
|  |  |  |  |  |  |  |  |
| Use of prescription psychoactive medication (any); N (%) | 425 (9.42) | 259 (32.70) | 234 (30.99) | 25 (67.57) | 52 (27.96) | 82 (36.12) | 146 (35.70) |
| Prescription for antidepressive and/or anxiolytics | 408 (9.04) | 259 (32.70) | 234 (30.99) | 25 (67.57) | 52 (27.96) | 82 (36.12) | 146 (35.70) |
|  |  |  |  |  |  |  |  |
| At least one diagnosis or use of prescription psychoactive medication; N (%) | 455 (10.08) | 263 (33.21) | 237 (31.39) | 26 (70.27) | 54 (29.03) | 83 (36.56) | 153 (37.41) |
|  |  |  |  |  |  |  |  |

Abbreviations: FSD = functional somatic disorder; IB = irritable bowel; CWP = chronic widespread pain; CF = chronic fatigue; NA = not applicable because number of observations was too low for obeying the Statistics Denmark’s requirements for statistical disclosure control in relation to personal data.

FSD, IB, CWP, and CF are established by means of self-reported questionnaires. Psychiatric discharge diagnoses and prescription psychoactive medication are obtained from National Danish Registries within a 10 year period before baseline. aCase status = status at baseline.

**Table S3: Baseline characteristics of the interviewed follow-up study sample (n=1,092)**

|  | | | | |
| --- | --- | --- | --- | --- |
|  | **No FSDa**  (n = 592) | **Overall FSDa**  (n = 183) | **Single-organ FSDa**  (n = 144) | **Multi-organ FSDa**  (n = 39) |
|  |  |  |  |  |
| Women; N (%) | 329 (55.57) | 133 (72.68) | 99 (68.75) | 34 (87.18) |
| Age at baseline; median (IQR) | 56 (48-64) | 54 (46-60) | 54 (47-60.5) | 54∙5 (43.5-57.5) |
| Social status; median (IQR) | 7 (6-8) | 6 (5-7) | 6 (5-7) | 7 (5-8) |
| Physical comorbidity; N (%) | 52 (8.78) | 10 (5.46) | NA | NA |
| Neuroticism; median (IQR) | 15 (11-21) | 21 (16-27) | 20 (16-26) | 23∙5 (15.5-30) |
|  |  |  |  |  |
| At least one psychiatric diagnosis; N (%) | 18 (3.04) | 13 (7.10) | NA | NA |
| Anxiety disorder | 5 (0.84) | 3 (1.34) | NA | NA |
| Depression | 4 (0.68) | 8 (4.37) | NA | NA |
| Personality disorder | NA | NA | NA | NA |
| Stress-related disorder | 8 (1.35) | NA | NA | NA |
|  |  |  |  |  |
| Use of prescription psychoactive medication (any); N (%) | 98 (16.55) | 63 (34.43) | 50 (34.72) | 13 (13.33) |
| Prescription for antidepressive and/or anxiolytics | NA | 63 (34.43) | 50 (34.72) | 13 (13.33) |
|  |  |  |  |  |
| At least one diagnosis or use of prescription psychoactive medication; N (%) | 103 (17.40) | 63 (34.43) | 50 (34.72) | 13 (33.33) |
|  |  |  |  |  |

Abbreviations: FSD = functional somatic disorder; NA = not applicable because number of observations were too low for obeying the Statistics Denmark’s requirements for statistical disclosure control in relation to personal data.

FSD is diagnosed with diagnostic interviews performed by trained family physicians. Psychiatric discharge diagnoses and prescription psychoactive medication are obtained from National Danish Registries within a 10 year period before baseline. aCase status = status at baseline.

**Table S4: Sex stratified associations between mental disorders and use of prescription medicine and functional somatic disorder at baseline**

|  | At least one diagnosis *or* use of prescription psychoactive medication  POR (95% CI) | | At least one psychiatric diagnosis  POR (95% CI) | | Use of prescription psychoactive medication (any)  POR (95% CI) | |
| --- | --- | --- | --- | --- | --- | --- |
| Cases established by self-reported symptom questionnaires at baseline | | | | | | |
|  | Male (n=4453) | Female (n=5203) | Male (n=4453) | Female (n=5203) | Male (n=4453) | Female (n=5203) |
| Overall FSD  (n = 1,543) 1 | **3.16 (2.53-3.90)** | **3.47 (2.97-4.0)** | **3.15 (2.06-4.83)** | **2.49 (1.84-3.36)** | **3.32 (2.65-4.10)** | **3.60 (3.07-4.21)** |
| Overall FSD  (n = 1,543) 2 | **2.28 (1.80-2.80)** | **2.68 (2.28-3.10)** | **1.91 (1.20-3.02)** | **1.72 (1.25-2.37)** | **2.40 (1.89-3.04)** | **2.77 (2.35-3.27)** |
| Single-organ FSD  (n = 1,447) 1 | **2.99 (2.38-3.70)** | **3.16 (2.69-3.70)** | **2.95 (1.89-4.58)** | **2.13 (1.54-2.94)** | **3.13 (2.49-3.94)** | **3.28 (2.79-3.80)** |
| Single-organ FSD  (n = 1,447) 2 | **2.20 (1.73-2.80)** | **2.50 (2.11-2.90)** | **1.83 (1.14-2.95)** | **1.55 (1.10-2.17)** | **2.32 (1.81-2.90)** | **2.59 (2.18-3.07)** |
| Multi-organ FSD  (n = 96) 1 | **9.47 (3.95-22.0)** | **12.33 (7.31-20.0)** | **5.95 (1.84-19.20)** | **6.90 (3.74-12.70)** | **10.70 (4.44-25.70)** | **12.08 (7.22-20.20)** |
| Multi-organ FSD  (n = 96) 2 | **4.33 (1.65-11.0)** | **6.82 (3.91-11.0)** | 2.15 (0.58-7.89) | **3.25 (1.65-6.38)** | **4.96 (1.91-12.0)** | **6.54 (3.77-11.30)** |
|  |  | |  | |  | |
| IB  (n = 337) 1 | **2.55 (1.54-4.20)** | **3.34 (2.53-4.0)** | NA | **3.21 (2.05-5.02)** | **2.77 (1.67-4.59)** | **3.32 (2.50-4.40)** |
| IB  (n = 337) 2 | **1.73 (1.01-2.90)** | **2.25 (1.67-3.0)** | NA | **1.91 (1.18-3.0)** | **1.88 (1.10-3.22)** | **2.19 (1.62-2.97)** |
| CWP  (n = 442) 1 | **3.45 (2.23-5.30)** | **3.78 (2.98-4.70)** | NA | **2.46 (1.52-3.96)** | **3.70 (2.39-5.73)** | **3.97 (3.12-5.03)** |
| CWP  (n = 442) 2 | **2.97 (1.88-4.60)** | **2.87 (2.23-3.60)** | NA | 1.49 (0.89-2.47) | **3.20 (2.03-5.05)** | **2.99 (2.32-3.84)** |
| CF  (n = 823) 1 | **4.05 (3.04-5.40)** | **4.05 (3.33-4.90)** | **2.84 (1.70-4.75)** | **2.54 (1.79-3.60)** | **4.32 (3.23-5.78)** | **4.13 (3.38-5.03)** |
| CF  (n = 823) 2 | **2.35 (1.71-3.20)** | **2.55 (2.06-3.10)** | 1.23 (0.69-2.17) | 1.27 (0.86-1.88) | **2.52 (1.83-3.45)** | **2.56 (2.06-3.17)** |
|  |  | |  | |  | |
| Cases established with diagnostic interviews at baseline | | | | | | |
|  | Male (n=648) | Female (n=942) | Male (n=648) | Female (n=942) | Male (n=648) | Female (n=942) |
| Overall FSD  (n = 412)1 | **2.23 (1.39-3.57)** | **2.60 (1.90-3.56)** | 1.70 (0.75-3.84) | **2.42 (1.39-4.24)** | **2.36 (1.47-3.80)** | **2.60 (1.90-3.58)** |
| Overall FSD  (n = 412) 2 | 1.34 (0.78-2.27) | **2.06 (1.48-2.86)** | 0.92 (0.38-2.22) | 1.69 (0.94-3.02) | 1.43 (0.84-2.44) | **2.06 (1.48-2.87)** |
| Single-organ FSD  (n = 326)1 | **2.37 (1.44-3.90)** | **2.31 (1.64-3.25)** | 1.69 (0.71-4.03) | **2.47 (1.36-4.48)** | **2.52 (1.53-4.16)** | **2.32 (1.64-3.29)** |
| Single-organ FSD  (n = 326) 2 | 1.55 (0.89-2.69) | **1.87 (1.31-2.68)** | 0.96 (0.38-2.44) | 1.83 (0.99-3.39) | 1.66 (0.95-2.90) | **1.87 (1.30-2.70)** |
| Multi-organ FSD  (n = 86)1 | **1.36 (0.41-4.49)** | **3.95 (2.30-6.78)** | NA | **2.51 (1.05-5.98)** | 1.41 (0.43-4.70) | **3.79 (0.20-6.51)** |
| Multi-organ FSD  (n = 86) 2 | 0.33 (0.08-1.47) | **2.76 (1.55-4.92)** | NA | 1.36 (0.54-3.46) | 0.35 (0.08-1.56) | **2.66 (1.50-4.74)** |
|  |  | |  | |  | |

Logistic regression analyses stratified by sex: 1adjusted for baseline levels of age, social status, and physical comorbidity; 2additional adjustment for baseline levels of neuroticism.

Abbreviations: FSD = functional somatic disorder; IB = irritable bowel; CWP = chronic widespread pain; CF = chronic fatigue; POR = prevalence odds ratio; CI = confidence interval. NA = not applicable because number of events were 0 or adjustment was not feasible as number of cases became too low for obeying the Statistics Denmark’s requirements for statistical disclosure control in relation to personal data.

**Table S5: Age stratified associations between mental disorders and use of prescription medicine and functional somatic disorder at baseline**

|  | At least one diagnosis *or* use of prescription psychoactive medication  POR (95% CI) | | | At least one psychiatric diagnosis  POR (95% CI) | | | Use of prescription psychoactive medication (any)  POR (95% CI) | | |
| --- | --- | --- | --- | --- | --- | --- | --- | --- | --- |
| Cases established by self-reported symptom questionnaires at baseline | | | | | | | | | |
|  | 18-39 (n=1624) | 40-59 (n=4572) | 60+ (n=3460) | 18-39 (n=1624) | 40-59 (n=4572) | 60+ (n=3460) | 18-39 (n=1624) | 40-59 (n=4572) | 60+ (n=3460) |
| Overall FSD  (n = 1,543) 1 | **3.78 (2.71-5.27)** | **3.80 (3.17-4.55)** | **2.67 (2.15-3.30)** | **2.97 (1.91-4.62)** | **3.20 (2.21-4.63)** | **1.77 (1.03-3.05)** | **3.94 (2.76-5.62)** | **3.92 (3.27-4.71)** | **2.81 (2.27-3.48)** |
| Overall FSD  (n = 1,543) 2 | **2.59 (1.80-3.71)** | **2.80 (2.31-3.39)** | **2.20 (1.75-2.75)** | **2.01 (1.24-3.26)** | **1.89 (1.28-2.81)** | 1.34 (0.76-2.38) | **2.56 (1.74-3.77)** | **2.90 (2.39-3.52)** | **2.32 (1.85-2.90)** |
| Single-organ FSD  (n = 1,447) 1 | **3.41 (2.41-4.82)** | **3.48 (2.89-4.20)** | **2.53 (2.03-3.14)** | **2.63 (1.64-4.21)** | **2.73 (1.84-4.06)** | **1.75 (1.01-3.05)** | **3.52 (2.43-5.10)** | **3.61 (2.99-4.36)** | **2.67 (2.14-3.32)** |
| Single-organ FSD  (n = 1,447) 2 | **2.39 (1.64-3.46)** | **2.64 (2.17-3.22)** | **2.11 (1.68-2.65)** | **1.87 (1.13-3.10)** | **1.73 (1.14-2.63)** | 1.33 (0.75-2.38) | **2.34 (1.56-3.49)** | **2.75 (2.25-3.35)** | **2.23 (1.77-2.80)** |
| Multi-organ FSD  (n = 96) 1 | **13.53 (4.55-40.21)** | **11.26 (6.28-20.20)** | **9.63 (3.79-24.48)** | **7.63 (2.62-22.23)** | **8.51 (4.14-17.49)** | NA | **13.45 (4.68-38.61)** | **10.94 (6.14-19.51)** | **10.24 (4.03-26.03)** |
| Multi-organ FSD  (n = 96) 2 | **7.38 (2.30-23.68)** | **5.53 (2.94-10.39)** | **5.43 (2.01-14.67)** | **5.43 (2.01-14.67)** | **3.95 (1.31-6.64)** | NA | **6.94 (2.20-21.88)** | **5.38 (2.88-10.04)** | **5.87 (2.17-15.85)** |
|  |  | | |  | | |  | | |
| IB  (n = 337) 1 | **3.03 (1.81-5.07)** | **3.50 (2.51-4.89)** | **2.39 (1.47-3.87)** | **4.05 (2.18-7.54)** | **2.04 (1.04-4.00)** | 2.00 (0.60-6.65) | **2.99 (1.72-5.22)** | **3.49 (2.49-4.88)** | **2.49 (1.54-4.04)** |
| IB  (n = 337) 2 | **1.79 (1.02-3.15)** | **2.36 (1.65-3.39)** | **1.78 (1.07-2.96)** | **2.53 (1.29-4.95)** | 1.05 (0.52-2.15) | 1.16 (0.33-4.11) | 1.62 (0.88-2.98) | **2.34 (1.63-3.37)** | **1.85 (1.11-3.08)** |
| CWP  (n = 442) 1 | **5.31 (2.39-11.78)** | **3.10 (2.29-4.20)** | **4.24 (3.10-5.79)** | 1.76 (0.50-6.18) | 1.40 (0.72-2.73) | **3.17 (1.57-6.41)** | **7.18 (3.21-16.07)** | **3.24 (2.39-4.39)** | **4.33 (3.17-5.93)** |
| CWP  (n = 442) 2 | **3.61 (1.55-8.44)** | **2.34 (1.69-3.23)** | **3.51 (2.53-4.86)** | 1.04 (0.28-3.87) | 0.78 (0.38-1.57) | **2.17 (1.03-4.56)** | **4.80 (2.02-11.45)** | **2.45 (1.77-3.39)** | **3.58 (2.58-4.96)** |
| CF  (n = 823) 1 | **3.02 (2.12-4.30)** | **3.92 (3.13-4.90)** | **5.05 (3.70-6.88)** | **2.58 (1.61-4.15)** | **2.29 (1.47-3.58)** | **4.23 (2.23-8.02)** | **3.19 (2.18-4.66)** | **3.89 (3.10-4.88)** | **5.18 (3.79-7.07)** |
| CF  (n = 823) 2 | **1.73 (1.17-2.57)** | **2.34 (1.83-3.00)** | **3.34 (2.40-4.67)** | 1.46 (0.86-2.48) | 0.95 (0.58-1.56) | 1.98 (0.95-4.12) | **1.72 (1.13-2.63)** | **2.33 (1.82-2.99)** | **3.42 (2.45-4.78)** |
|  |  | | |  | | |  | | |
| Cases established with diagnostic interviews at baseline | | | | | | | | | |
|  | 18-39 (n=274) | 40-59 (n=787) | 60+ (n=529) | 18-39 (n=274) | 40-59 (n=787) | 60+ (n=529) | 18-39 (n=274) | 40-59 (n=787) | 60+ (n=529) |
| Overall FSD  (n = 412)1 | 1.51 (0.80-2.89) | **2.76 (1.93-3.94)** | **2.40 (1.48-3.89)** | **2.27 (1.01-5.11)** | **2.06 (1.04-4.08)** | 2.15 (0.79-5.90) | 1.40 (0.70-2.80) | **2.83 (1.98-4.05)** | **2.43 (1.50-3.94)** |
| Overall FSD  (n = 412) 2 | 1.16 (0.59-2.30) | **2.01 (1.37-2.97)** | **1.75 (1.04-2.94)** | 1.79 (0.77-4.17) | 1.25 (0.61-2.54) | 1.15 (0.39-3.37) | 1.05 (0.50-2.17) | **2.08 (1.42-3.06)** | **1.77 (1.05-2.97)** |
| Single-organ FSD  (n = 326)1 | 1.18 (0.57-2.45) | **2.63 (1.78-3.89)** | **2.29 (1.38-3.81)** | 1.85 (0.74-4.60**)** | **2.24 (1.10-4.59)** | 2.44 (0.89-2.48) | 1.12 (0.50-2.48) | **2.70 (1.82-4.00)** | **2.23 (1.39-3.86)** |
| Single-organ FSD  (n = 326) 2 | 0.97 (0.45-2.06) | **1.98 (1.30-3.02)** | 1.70 (0.98-2.94) | 1.54 (0.60-3.94) | 1.45 (0.69-3.04) | 1.37 (0.47-4.01) | 0.87 (0.38-1.99) | **2.05 (1.35-3.12)** | 1.72 (0.99-2.97) |
| Multi-organ FSD  (n = 86)1 | **3.20 (1.16-8.79)** | **3.15 (1.69-5.89)** | **3.49 (1.01-12.07)** | **4.36 (1.31-14.52)** | 1.43 (0.43-4.78) | NA | 2.68 (0.94-7.67) | **3.24 (1.73-6.04)** | **3.52 (1.01-12.19)** |
| Multi-organ FSD  (n = 86) 2 | 2.31 (0.79-6.74) | 1.84 (0.92-3.67) | 1.82 (0.46-7.17) | 2.84 (0.77-10.44) | 0.88 (0.25-3.10) | NA | 1.97 (0.66-5.88) | 1.90 (0.95-3.80) | 1.83 (0.46-7.22) |
|  | | | | | | | | | |

Logistic regression analyses stratified by age: 1adjusted for baseline levels of sex, social status, and physical comorbidity; 2additional adjustment for baseline levels of neuroticism.

Abbreviations: FSD = functional somatic disorder; IB = irritable bowel; CWP = chronic widespread pain; CF = chronic fatigue; POR = prevalence odds ratio; CI = confidence interval. NA = not applicable because number of events were 0 or adjustment was not feasible as number of cases became too low for obeying the Statistics Denmark’s requirements for statistical disclosure control in relation to personal data.

**Table S6: Mental disorders as risk factor for developing functional somatic disorder at follow-up, stratified by sex**

|  | At least one diagnosis *or* use of prescription psychoactive medication  OR (95% CI) | | At least one psychiatric diagnosis  OR (95% CI) | | Use of prescription psychoactive medication (any)  OR (95% CI) | |
| --- | --- | --- | --- | --- | --- | --- |
| Incident cases established by self-reported symptom questionnaires at follow-up | | | | | | |
|  | Male (n=2678) | Female (n=3060) | Male (n=2678) | Female (n=3060) | Male (n=2678) | Female (n=3060) |
| Overall FSD  (n = 548) 1 | **1.95 (1.31-2.90)** | **1.94 (1.44-2.62)** | **3.25 (1.46-7.21)** | **2.16 (1.18-3.98)** | **1.98 (1.32-2.96)** | **1.97 (1.44-2.68)** |
| Overall FSD  (n = 548) 2 | **1.60 (1.05-2.42)** | **1.59 (1.17-2.18)** | **2.54 (1.11-5.79)** | 1.59 (0.85-3.00) | **1.61 (1.05-2.45)** | **1.60 (1.16-2.21)** |
| Single-organ FSD  (n = 519) 1 | **1.99 (1.33-2.99)** | **1.97 (1.45-2.67)** | **3.43 (1.54-7.63)** | **2.29 (1.25-4.22)** | **2.02 (1.34-3.05)** | **1.99 (1.45-2.73)** |
| Single-organ FSD  (n = 519) 2 | **1.74 (1.14-2.64)** | **1.65 (1.20-2.27)** | **2.78 (1.22-6.35)** | 1.72 (0.92-3.24) | **1.75 (1.14-2.67)** | **1.66 (1.19-2.30)** |
| Multi-organ FSD  (n = 29) 1 | NA | 1.43 (0.40-5.05) | NA | NA | NA | 1.54 (0.44-5.49) |
| Multi-organ FSD  (n = 29) 2 | NA | 0.80 (0.21-2.99) | NA | NA | NA | 0.87 (0.23-3.25) |
|  |  | |  | |  | |
| IB  (n = 105) 1 | 2.32 (0.86-6.28) | 1.26 (0.68-2.35) | NA | 1.00 (0.29-3.41) | 2.46 (0.91-6.68) | 1.12 (0.58-2.19) |
| IB  (n = 105) 2 | 1.81 (0.64-5.13) | 1.08 (0.57-2.08) | NA | 0.77 (0.22-2.74) | 1.92 (0.67-5.45) | 0.94 (0.47-1.89) |
| CWP  (n = 190) 1 | 1.42 (0.73-2.77) | **2.40 (1.55-3.74)** | 1.95 (0.57-6.68) | 2.25 (0.86-5.90) | 1.49 (0.77-2.90) | **2.29 (1.46-3.59)** |
| CWP  (n = 190) 2 | 1.29 (0.65-2.56) | **2.13 (1.46-3.66)** | 1.61 (0.45-5.72) | 1.91 (0.71-5.14) | 1.35 (0.68-2.68) | **2.18 (1.36-3.50)** |
| CF  (n = 257) 1 | **2.18 (1.24-3.82)** | **2.71 (1.87-3.93)** | 1.42 (0.42-4.81) | **2.57 (1.30-5.06)** | **2.18 (1.23-3.88)** | **2.65 (1.80-3.89)** |
| CF  (n = 257) 2 | 1.66 (0.91-3.00) | **1.87 (1.26-2.79)** | 1.05 (0.30-3.62) | 1.44 (0.69-3.00) | 1.63 (0.89-3.01) | **1.78 (1.18-2.69)** |
|  |  | |  | |  | |
| Incident cases established with diagnostic interviews at follow-up | | | | | | |
|  | Male (n=424) | Female (n=668) | Male (n=424) | Female (n=668) | Male (n=424) | Female (n=668) |
| Overall FSD  (n = 59) 1 | 2.45 (0.69-8.98) | 1.57 (0.69-3.56) | NA | 2.59 (0.58-11.56) | 2.61 (0.71-9.64) | 1.89 (0.83-4.32) |
| Overall FSD  (n = 59) 2 | 1.68 (0.34-8.30) | 0.98 (0.41-2.37) | NA | 1.97 (0.40-9.66) | 1.85 (0.39-8.84) | 1.19 (0.49-2.89) |
| Single-organ FSD  (n = 50) 1 | 2.39 (0.49-11.63) | 1.08 (0.43-2.75) | NA | NA | 2.58 (0.52-12.68) | 1.31 (0.52-3.35) |
| Single-organ FSD  (n = 50) 2 | 2.21 (0.28-17.44) | 0.66 (0.24-1.79) | NA | NA | 2.41 (0.32-18.14) | 0.82 (0.30-2.21) |
| Multi-organ FSD  (n = 9) 1 | NA | NA | NA | NA | NA | NA |
| Multi-organ FSD  (n = 9) 2 | NA | NA | NA | NA | NA | NA |
|  |  | |  | |  | |

Logistic regression analyses stratified by sex: 1 adjusted for baseline levels of age, social status, and physical comorbidity; 2additional adjustment for baseline levels of neuroticism.

* Not adjusted due to the low number of cases, in order to avoid overfitting.

Abbreviations: FSD = functional somatic disorder; IB = irritable bowel; CWP = chronic widespread pain; CF = chronic fatigue; OR = odds ratio; CI = confidence interval; NA = not applicable because number of events were 0 or adjustment was not feasible as number of cases became too low for obeying the Statistics Denmark’s requirements for statistical disclosure control in relation to personal data.

**Table S7: Mental disorders as risk factor for developing functional somatic disorder at follow-up, stratified by age**

|  | At least one diagnosis *or* use of prescription psychoactive medication  OR (95% CI) | | | At least one psychiatric diagnosis  OR (95% CI) | | | Use of prescription psychoactive medication (any)  OR (95% CI) | | |
| --- | --- | --- | --- | --- | --- | --- | --- | --- | --- |
| Cases established by self-reported symptom questionnaires at baseline | | | | | | | | | |
|  | 18-39 (n=664) | 40-59 (n=2878) | 60+ (n=2196) | 18-39 (n=664) | 40-59 (n=2878) | 60+ (n=2196) | 18-39 (n=664) | 40-59 (n=2878) | 60+ (n=2196) |
| Overall FSD  (n = 548) 1 | **3.15 (1.64-6.06)** | **1.96 (1.40-2.74)** | **1.66 (1.10-2.50)** | 2.23 (0.95-5.20) | 2.00 (0.92-4.36) | **4.82 (1.86-12.50)** | **4.15 (2.02-8.52)** | **1.96 (1.39-2.76)** | **1.58 (1.04-2.41)** |
| Overall FSD  (n = 548) 2 | **2.28 (1.13-4.60)** | **1.57 (1.10-2.23)** | 1.48 (0.97-2.26) | 1.70 (0.68-4.22) | 1.36 (0.60-3.05) | **4.04 (1.54-10.63)** | **2.70 (1.24-5.92)** | **1.57 (1.10-2.24)** | 1.41 (0.91-2.18) |
| Single-organ FSD  (n = 519) 1 | **3.48 (1.79-6.74)** | **2.04 (1.45-2.87)** | **1.57 (1.03-2.87)** | **2.42 (1.03-5.68)** | 2.12 (0.97-4.62) | **5.06 (1.95-13.14)** | **4.57 (2.21-9.47)** | **2.05 (1.45-2.89)** | 1.49 (0.96-2.31) |
| Single-organ FSD  (n = 519) 2 | **2.59 (1.28-5.26)** | **1.67 (1.17-2.38)** | 1.48 (0.96-2.29) | 1.87 (0.75-4.66) | 1.48 (0.66-3.31) | **4.35 (1.65-11.42)** | **3.12 (1.42-6.88)** | **1.67 (1.17-2.40)** | 1.41 (0.90-2.20) |
| Multi-organ FSD  (n = 29) 1 | NA | NA | 3.83 (0.94-15.59) | NA | NA | NA | NA | NA | 3.93 (0.97-16.00) |
| Multi-organ FSD  (n = 29) 2 | NA | NA | NA | NA | NA | NA | NA | NA | NA |
|  |  | | |  | | |  | | |
| IB  (n = 105) 1 | 2.10 (0.72-6.11) | 0.83 (0.35-1.97) | **2.94 (1.20-7.24)** | 1.90 (0.50-7.22) | NA | NA | 1.39 (0.38-5.13) | 0.87 (0.36-2.07) | **3.02 (1.23-7.44)** |
| IB  (n = 105) 2 | 1.91 (0.62-5.93) | 0.68 (0.28-1.68) | 2.38 (0.93-6.10) | 1.67 (0.41-6.73) | NA | NA | 1.14 (0.28-4.66) | 0.71 (0.29-1.76) | 2.43 (0.95-6.26) |
| CWP  (n = 190) 1 | NA | **2.49 (1.53-4.06)** | 1.46 (0.80-2.66) | NA | 1.85 (0.63-5.39) | 3.05 (0.87-10.63) | NA | **2.45 (1.49-4.03)** | 1.37 (0.74-2.53) |
| CWP  (n = 190) 2 | NA | **2.16 (1.29-3.63)** | 1.47 (0.80-2.70) | NA | 1.34 (0.44-4.06) | 2.91 (0.81-10.38) | NA | **2.12 (1.25-3.59)** | 1.36 (0.73-2.56) |
| CF  (n = 257) 1 | **4.11 (2.13-7.93)** | **2.65 (1.71-4.10)** | 1.79 (0.96-3.36) | **2.74 (1.16-6.50)** | **2.90 (1.23-6.82)** | NA | **4.56 (2.21-9.41)** | **2.53 (1.62-3.95)** | 1.85 (0.99-3.46) |
| CF  (n = 257) 2 | **2.61 (1.28-5.35)** | **2.00 (1.26-3.17)** | 1.34 (0.69-2.60) | 1.79 (0.69-4.61) | 1.75 (0.71-4.32) | NA | **2.38 (1.06-5.33)** | **1.89 (1.18-3.04)** | 1.38 (0.71-2.68) |
|  |  | | |  | | |  | | |
| Cases established with diagnostic interviews at baseline | | | | | | | | | |
|  | 18-39 (n=121) | 40-59 (n=564) | 60+ (n=407) | 18-39 (n=121) | 40-59 (n=564) | 60+ (n=407) | 18-39 (n=121) | 40-59 (n=564) | 60+ (n=407) |
| Overall FSD  (n = 59) 1 | 1.44 (0.20-10.21) | **2.54 (1.03-6.26)** | NA | NA | 2.92 (0.67-12.81) | NA | NA | **2.76 (1.12-6.80)** | NA |
| Overall FSD  (n = 59) 2 | 0.95 (0.10-8.95) | 1.32 (0.48-3.62) | NA | NA | 1.68 (0.36-7.82 | NA | NA | 1.50 (0.55-4.07) | NA |
| Single-organ FSD  (n = 50) 1 | 1.53 (0.20-11.56) | 1.91 (0.69-5.29) | NA | NA | NA | NA | NA | 2.09 (0.76-5.79) | NA |
| Single-organ FSD  (n = 50) 2 | 0.88 (0.08-10.11) | 1.09 (0.36-3.32) | NA | NA | NA | NA | NA | 1.24 (0.41-3.74) | NA |
| Multi-organ FSD  (n = 9) 1 | NA | **7.07 (1.14-43.70)** | NA | NA | NA | NA | NA | **7.43 (1.21-45.68)** | NA |
| Multi-organ FSD  (n = 9) 2 | NA | 2.56 (0.32-20.71) | NA | NA | NA | NA | NA | 2.85 (0.36-22.32) | NA |
|  | | | | | | | | | |

Logistic regression analyses stratified by age: 1adjusted for baseline levels of sex, social status, and physical comorbidity; 2additional adjustment for baseline levels of neuroticism.

Abbreviations: FSD = functional somatic disorder; IB = irritable bowel; CWP = chronic widespread pain; CF = chronic fatigue; POR = prevalence odds ratio; CI = confidence interval. NA = not applicable because number of events were 0 or adjustment was not feasible as number of cases became too low for obeying the Statistics Denmark’s requirements for statistical disclosure control in relation to personal data.
